# Supplementary material for: Fabrication of TiVO4 photoelectrode for photoelectrochemical application
Source: Royal Society of Chemistry journal article supplement (doi:10.1039/d2ra05894d), 2022-01-01
Supplement: d2ra05894d1.pdf [file d2ra05894d1.pdf]

## Supporting Information

### Fabrication of $\text{TiVO}_4$ photoelectrode for photoelectrochemical application

Manal Alruwaili<sup>1,2\*</sup>, Anurag Roy<sup>1</sup>, Srijita Nandy<sup>1</sup>, Asif Ali Tahir<sup>1\*</sup>

<sup>1</sup>Environment and Sustainability Institute, Faculty of Environment, Science and Economy, University of Exeter, Penryn TR10 9FE, United Kingdom.

<sup>2</sup> Physics Department, Faculty of Science, Jouf University, P.O. Box 2014, Sakaka 42421, Saudi Arabia

\*Corresponding authors: [ma942@exeter.ac.uk](mailto:ma942@exeter.ac.uk) (M.A.); [a.tahir@exeter.ac.uk](mailto:a.tahir@exeter.ac.uk) (A.A.T.)

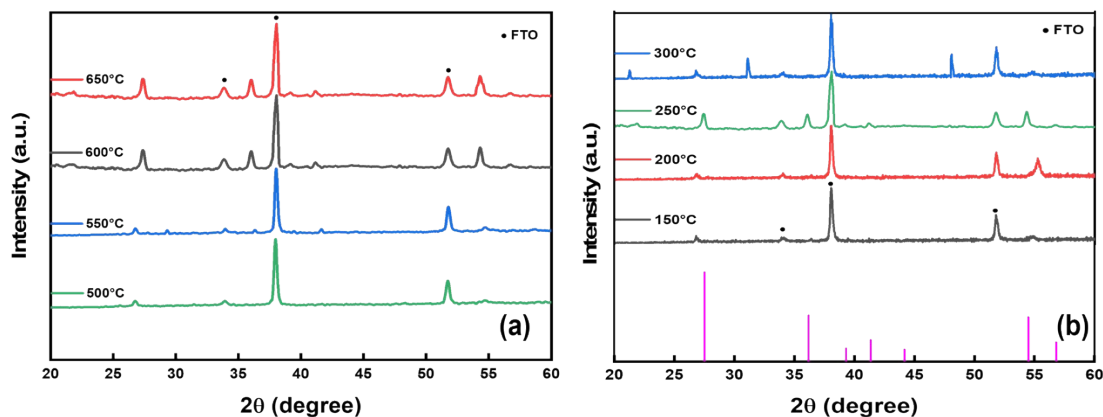

**Fig. S1** XRD pattern of spray pyrolyzed  $\text{TiVO}_4$  photoanode deposited on FTO glass at different annealing temperatures (a), and at different substrate temperatures (b).

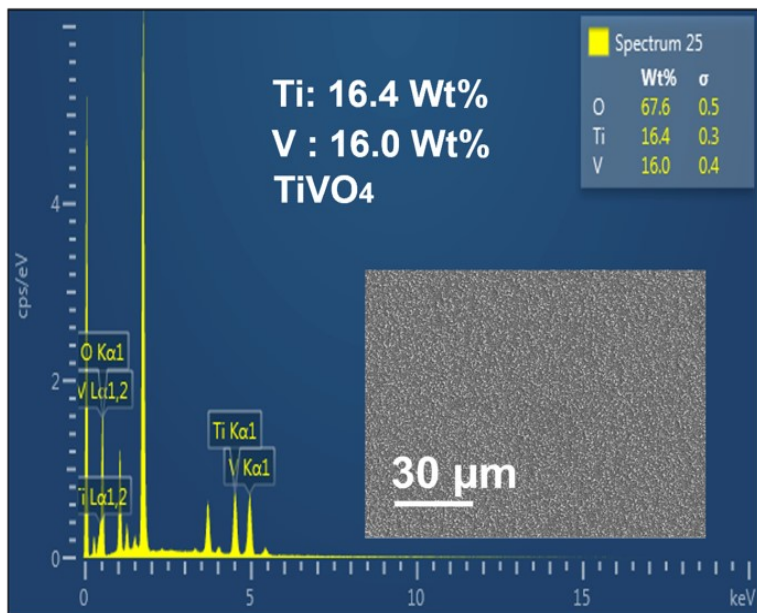

**Fig. S2** EDS spectrum of pyrolyzed  $\text{TiVO}_4$  photoanode deposited at 250°C.
